# Supplementary material
Source: ML conference proceedings conference paper supplement (https://proceedings.neurips.cc/paper_files/paper/2020/hash/ed46558a56a4a26b96a68738a0d28273-Abstract.html)

(b) 1-d,  $w_t \sim w_{t-1} + U(-0.2, 0.2)$

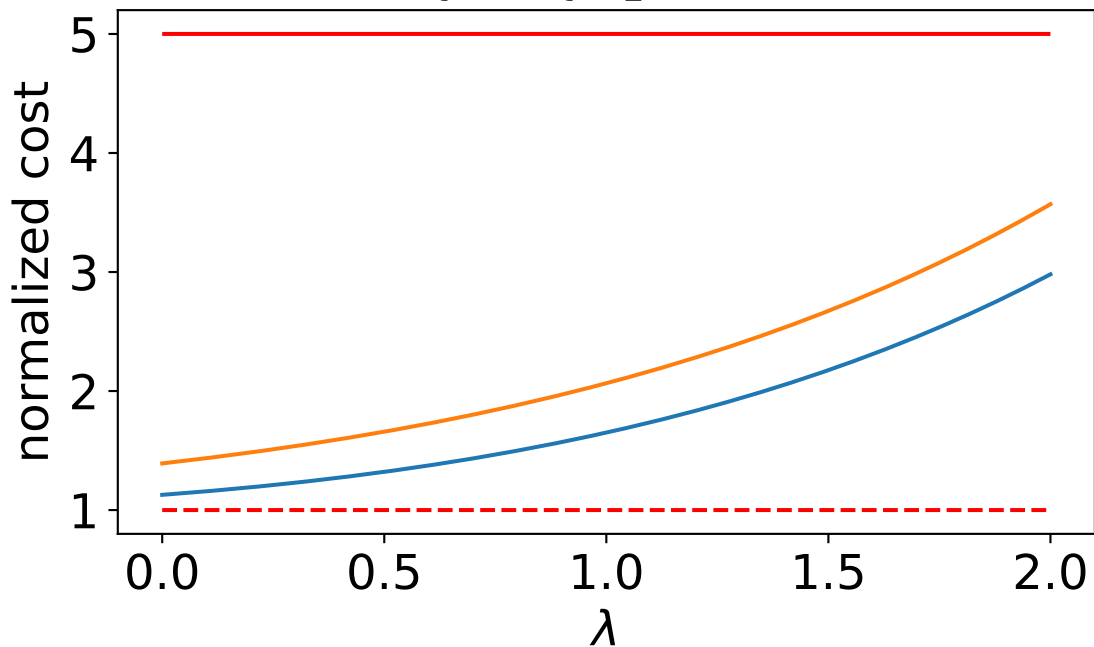

Supplement: Supplementary file [file ed46558a56a4a26b96a68738a0d28273-Supplemental.zip]
